# Supplementary material for: Degenerated, Undifferentiated, Rearranged, Lost: High Variability of Sex Chromosomes in Geometridae (Lepidoptera) Identified by Sex Chromatin
Source: MDPI journal article supplement (doi:10.3390/cells10092230), 2021-08-28
Supplement: s1 [file s1]

| Species                         | Sex chromatin F/M * | Cytogenetics F/M ** | Broods analysed *** | Localities of collection ****                                                                           |
|---------------------------------|---------------------|---------------------|---------------------|---------------------------------------------------------------------------------------------------------|
| <i>Aethalura punctulata</i>     | 8/6                 | 5/6                 | 2                   | České Budějovice CZ                                                                                     |
| <i>Chiasmia clathrata</i>       | 28/15               | 11/2                | 4                   | České Budějovice + Kuří (Benešov nad Černou) CZ                                                         |
| <i>Epirrhoe alternata</i>       | 25/9                | 19/5                | 5                   | České Budějovice + Kuří (Benešov nad Černou) + Vyšenské kopce (Český Krumlov) CZ + Karilatsi (Põlva) EE |
| <i>Hylaea fasciaria</i>         | 7/3                 | 4/2                 | 1                   | Karilatsi (Põlva) EE                                                                                    |
| <i>Hypomecis atomaria</i>       | 12/5                | 7/6                 | 3                   | České Budějovice + Vyšenské kopce (Český Krumlov) CZ                                                    |
| <i>Operophtera brumata</i>      | 11/3                | 9/6                 | 4                   | České Budějovice CZ                                                                                     |
| <i>Peribatodes rhomboidaria</i> | 7/8                 | 7/4                 | 3                   | České Budějovice + Javorník (Hodonín) CZ                                                                |
| <i>Pseudopanthera macularia</i> | 5/4                 | 4/5                 | 3                   | Brněnec (Svitavy) + Sulíkov (Blansko) + Chvalnov-Lísky (Kroměříž) CZ                                    |

\* Total number of individuals (including adults) inspected for sex chromatin: females/males

\*\* Total number of individuals in analysed/karyotyped by molecular cytogenetics (CGH, GISH, FISH, DAPI staining): females/males

\*\*\* Number of broods (i.e. offsprings of a single female) inspected by molecular cytogenetics

\*\*\*\* Localities of collection: CZ = Czech Republic; EE = Estonia
